# Supplementary material for: Metallic to half-metallic transition driven by pressure and anion composition in niobium oxyfluoride
Source: Royal Society of Chemistry journal article supplement (doi:10.1039/d2tc01563c), 2023-01-01
Supplement: d2tc01563c1.pdf [file d2tc01563c1.pdf]

## Supplemental Material for Metallic to half-metallic transition driven by pressure and anion composition in niobium oxyfluoride

Eliza Dempsey<sup>1</sup> and James Cumby<sup>1\*</sup>

<sup>1</sup>*School of Chemistry, University of Edinburgh, David Brewster Road, Edinburgh, EH9 3FJ.*

Email: james.cumby@ed.ac.uk

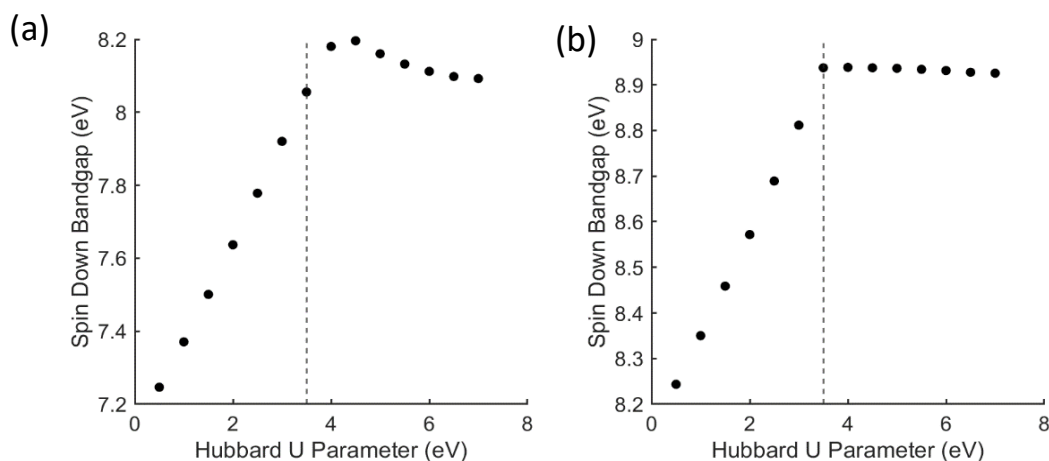

**FIG. S1.** Variation in calculated spin down band gap for cubic NbF<sub>3</sub> with Hubbard U parameter for (a) optimised geometry and (b) experimental geometry (ICSD #280539).

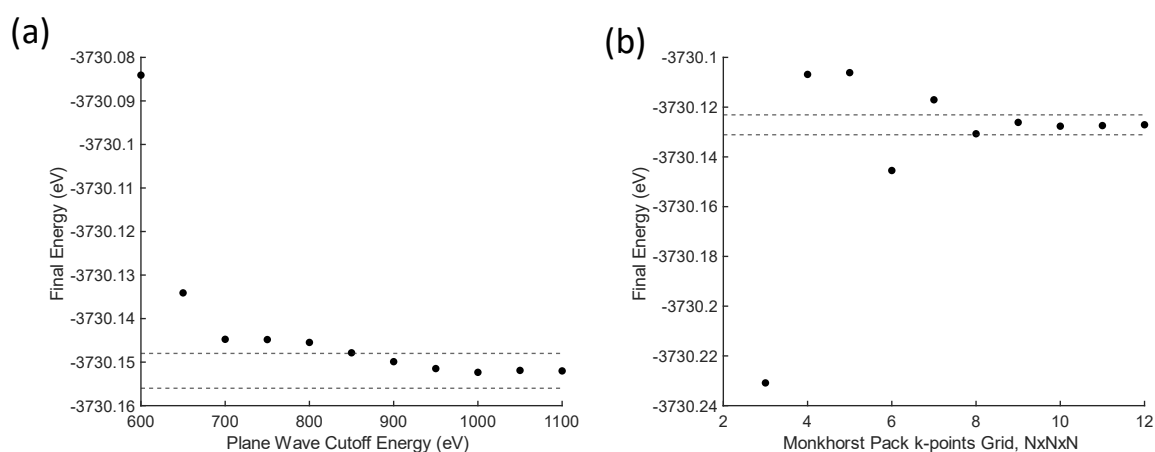

**FIG. S2.** Convergence testing for DFT calculations on cubic NbF<sub>3</sub> to optimise (a) plane wave cutoff energy and (b) k-point grid spacing to within a tolerance of  $\pm 0.004$  eV shown by dashed lines.

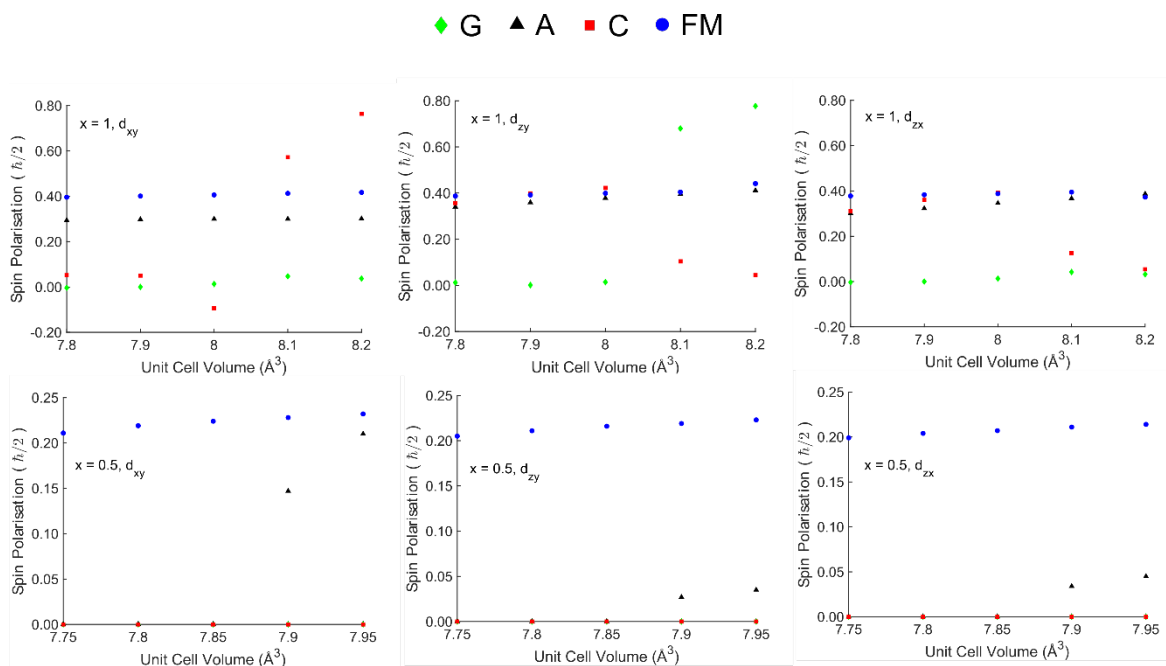

**FIG. S3.** Calculated atomic orbital spin polarisations for the  $\text{NbO}_{2-x}\text{F}_{1+x}$   $t_{2g}$  orbitals calculated using the LCAO projection approach within CASTEP.

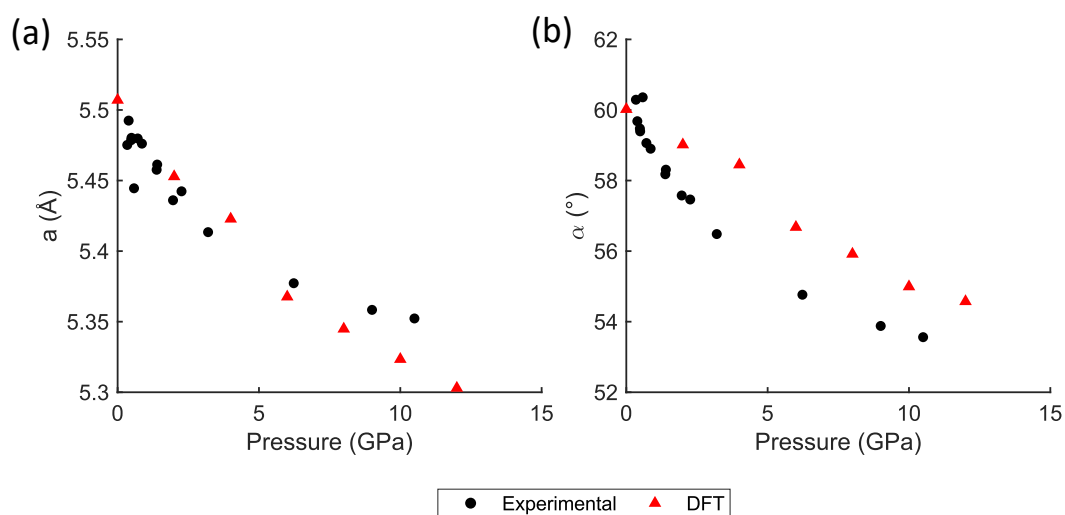

**FIG. S4.** The variation in DFT calculated rhombohedral unit cell parameters (a)  $a$  and (b)  $\alpha$  with pressure compared with experimental results from Carlson *et al.*<sup>1,2</sup>

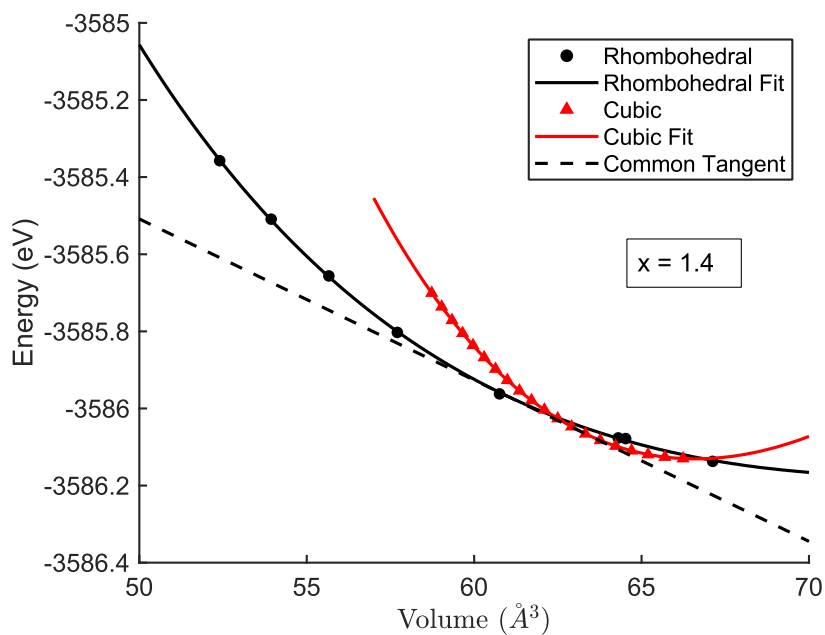

**FIG. S5:** Birch-Murnaghan equation of state fitting for DFT geometry optimisations of both cubic ( $Pm\bar{3}m$ ) and rhombohedral ( $R\bar{3}c$ )  $NbO_{0.6}F_{2.4}$  with a common tangent fit to estimate the transition pressure.

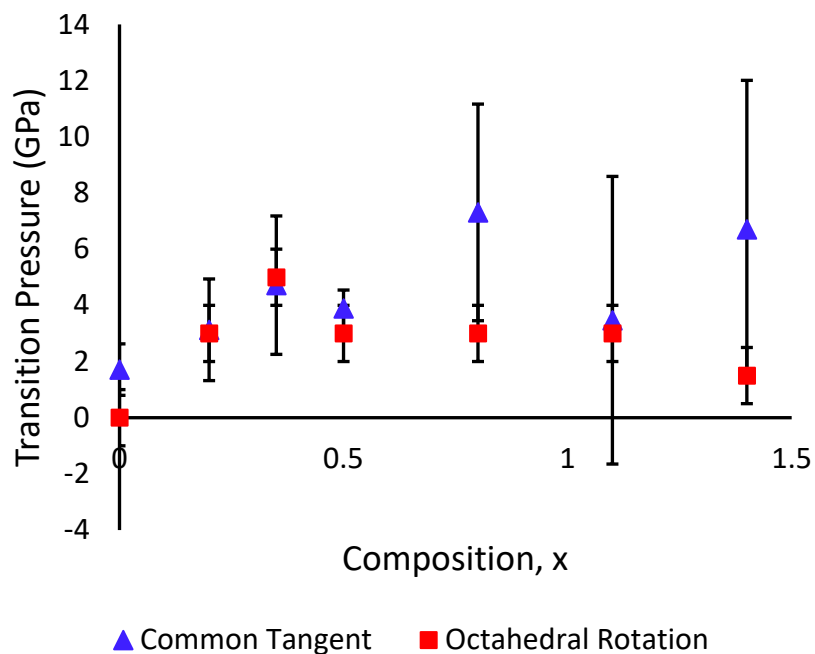

**FIG. S6:** Estimations of cubic to rhombohedral transition pressure for  $NbO_{2-x}F_{1+x}$  determined from a common tangent approach and by comparing octahedral rotations.

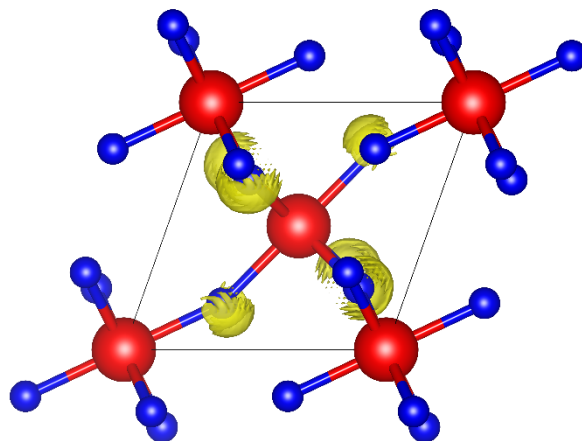

**FIG. S7** Calculated electron localisation function (ELF) for  $\text{NbO}_2\text{F}$  at ambient pressure shown as an isosurface (yellow). Nb atoms are shown in red whilst O/F anions are shown in blue.

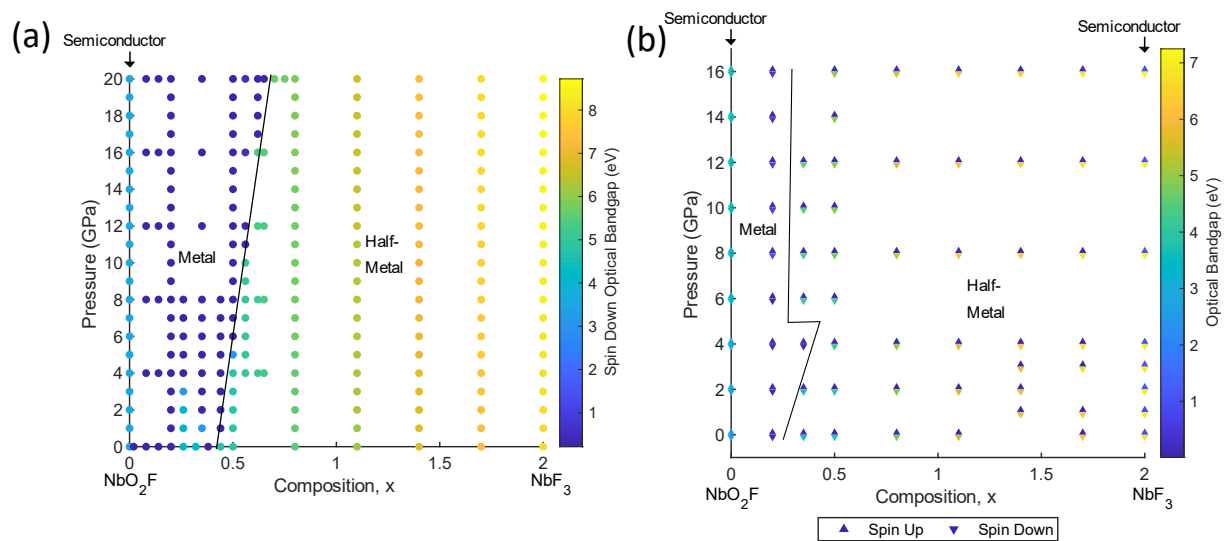

**FIG. S8** DFT Calculated optical band gaps for a) cubic and b) rhombohedral  $\text{NbO}_{2-x}\text{F}_{1+x}$  at each composition and external pressures up to 20 GPa.

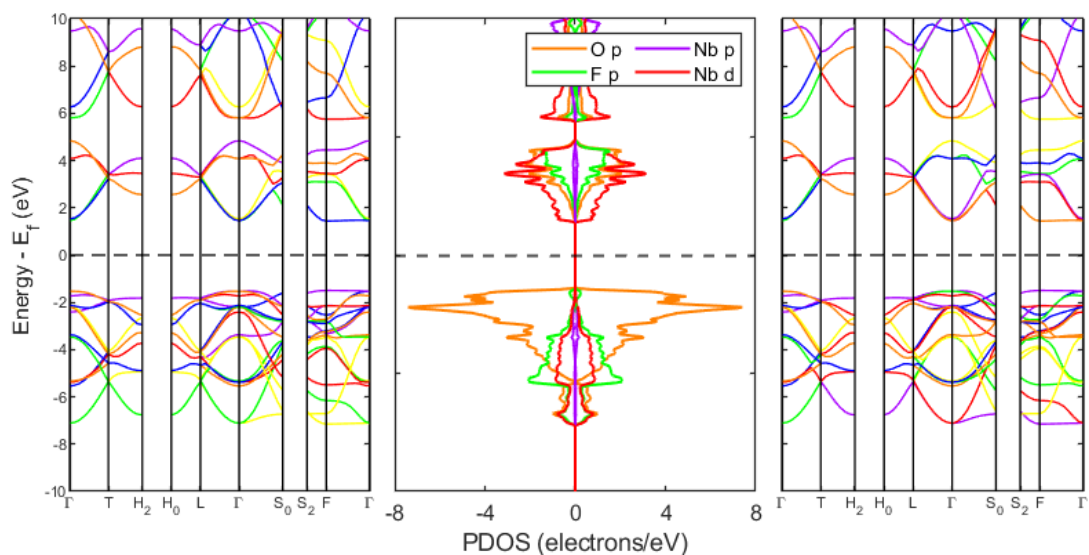

**FIG. S9.** DFT calculated band structure and PDOS for rhombohedral NbO<sub>2</sub>F at an external pressure of 4 GPa.

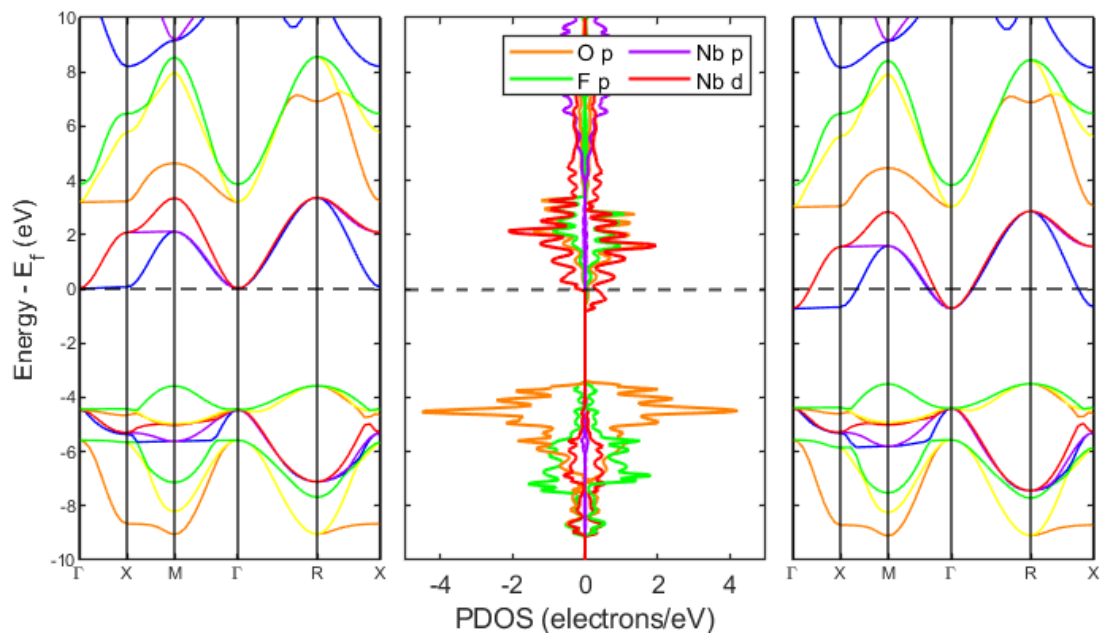

**FIG. S10.** DFT calculated band structure and PDOS for cubic NbO<sub>1.65</sub>F<sub>1.35</sub> at an external pressure of 4 GPa.

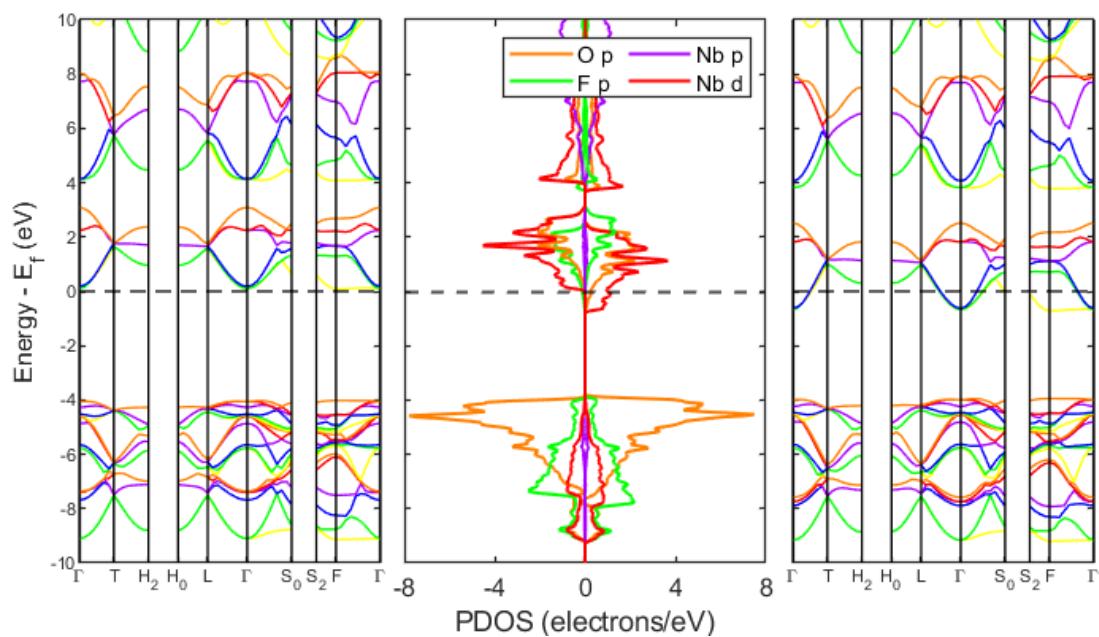

**FIG. S11.** DFT calculated band structure and PDOS for rhombohedral NbO<sub>1.65</sub>F<sub>1.35</sub> at an external pressure of 6 GPa.

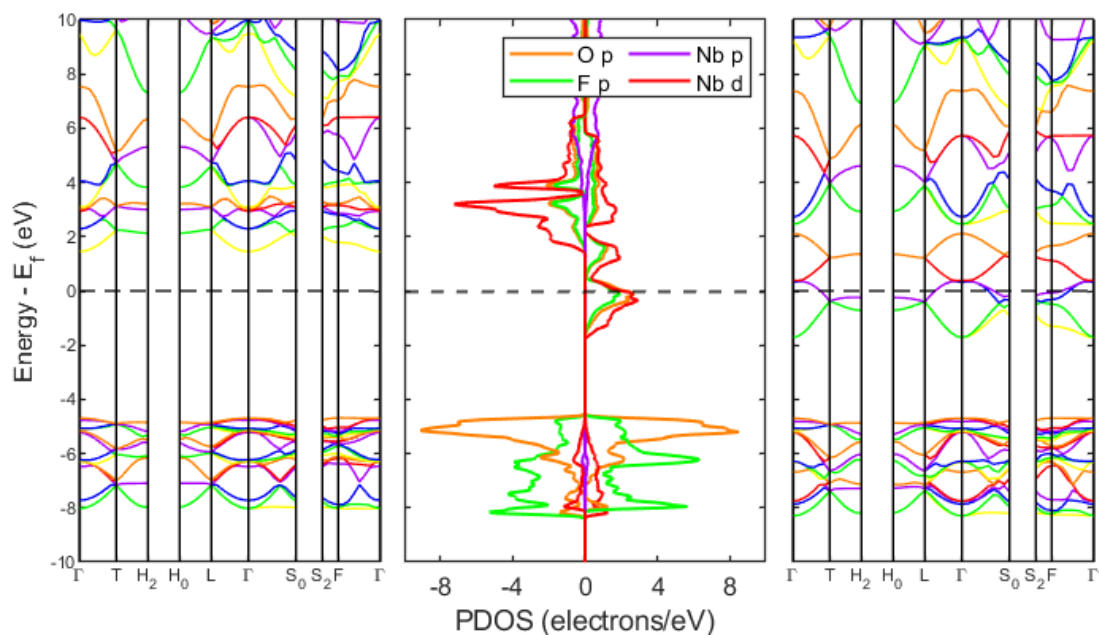

**FIG. S12.** DFT calculated band structure and PDOS for rhombohedral NbO<sub>0.3</sub>F<sub>2.7</sub> at ambient pressure.

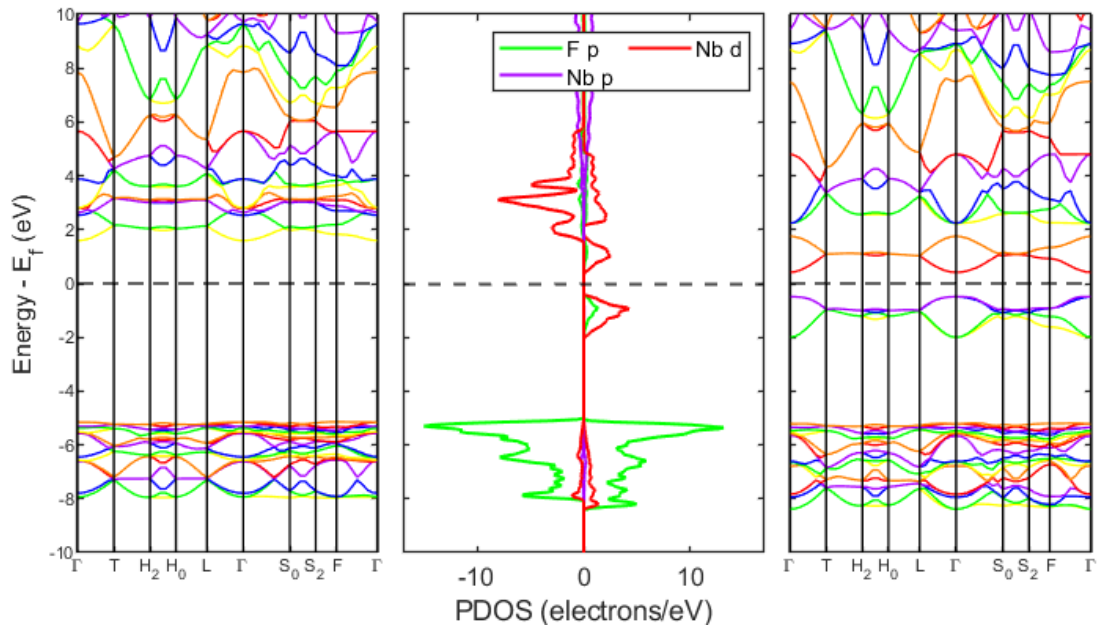

**FIG. S13.** DFT calculated band structure and PDOS for rhombohedral NbF<sub>3</sub> at ambient pressure.

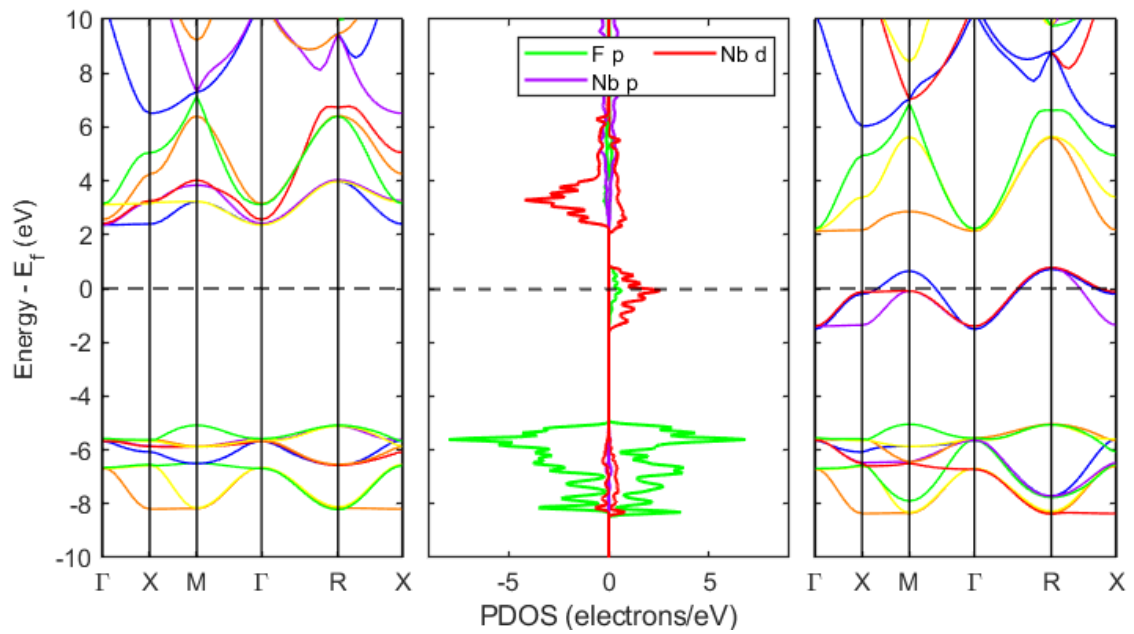

**FIG. S14.** DFT calculated band structure and PDOS for cubic NbF<sub>3</sub> at ambient pressure.

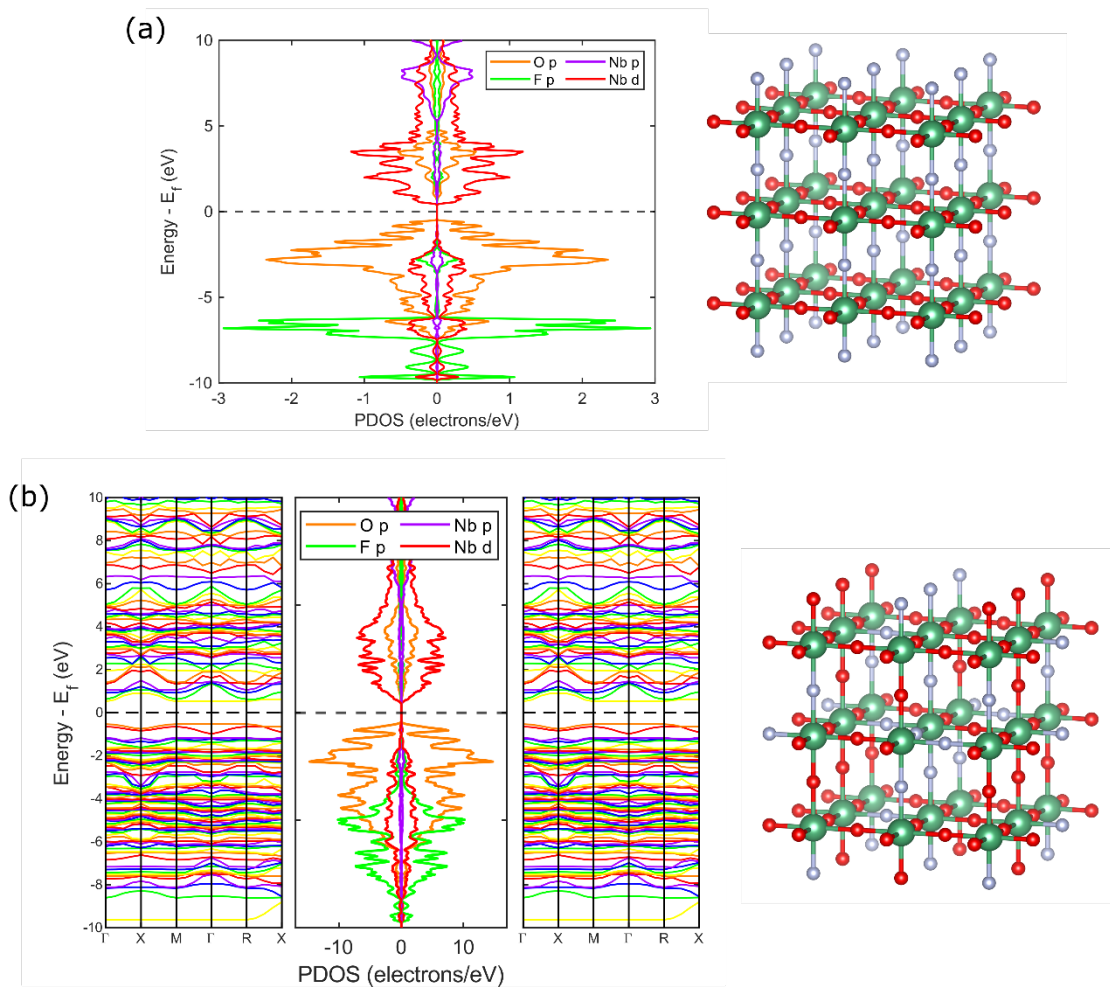

**FIG. S15.** DFT calculated electronic structure for anion-ordered supercell of cubic  $\text{NbO}_2\text{F}$  at ambient pressure (a) PDOS and supercell structure anions ordered in layers (b) PDOS and bandstructure with more disordered supercell structure.

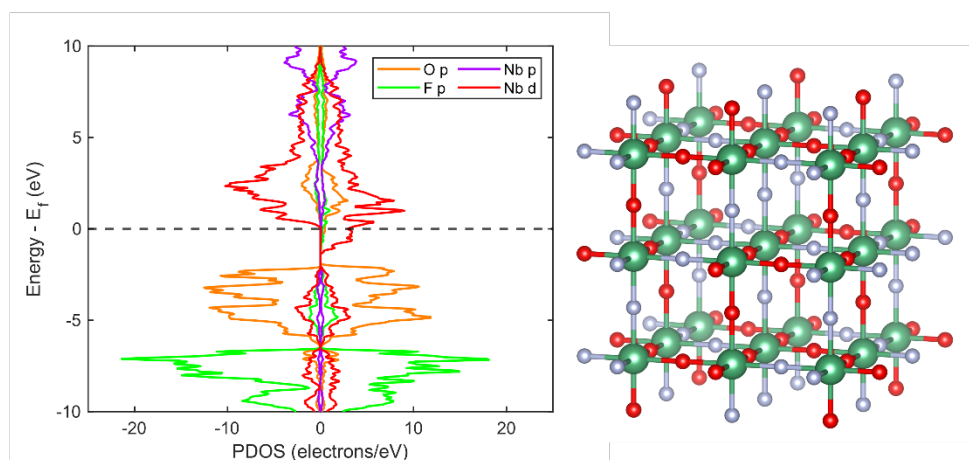

**FIG. S16.** DFT calculated PDOS and supercell structure for anion-ordered cubic  $\text{NbO}_{1.5}\text{F}_{1.5}$  at ambient pressure with oxygen and fluorine anions ordered over alternating sites.



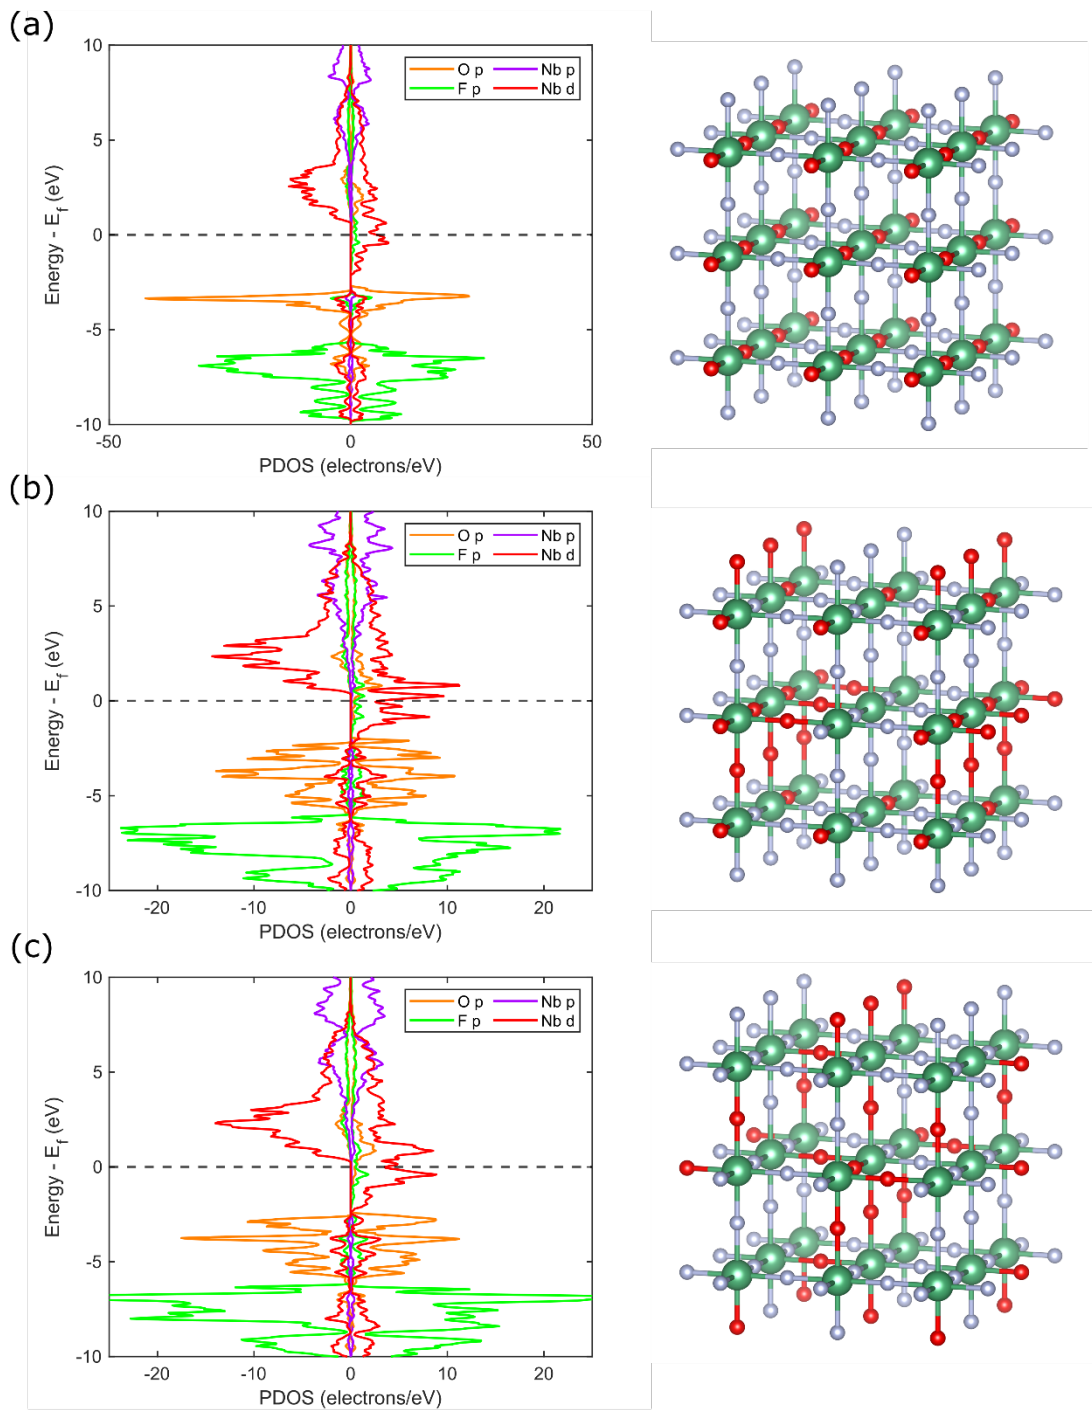

**FIG. S17.** DFT calculated PDOS and supercell structures for anion-ordered cubic NbOF<sub>2</sub> at ambient pressure (a) anions ordered in layers (b) more disordered anion structure (c) analogue of S15(b) anion structure with fluorine and oxygen sites reversed.

## References

1. S. Carlson, *J. Appl. Crystallogr.*, 2000, **33**, 1175-1176.
2. S. Carlson, A.-K. Larsson and F. E. Rohrer, *Acta Crystallogr. Sect. B*, 2000, **56**, 189-196.
